# Supplementary material for: Tuning CO2 reaction enthalpy via metal complexes for advanced amine technology
Source: Royal Society of Chemistry journal article supplement (doi:10.1039/d3gc04080a), 2024-01-01
Supplement: d3gc04080a1.pdf [file d3gc04080a1.pdf]

## Supplementary information for

### Tuning CO<sub>2</sub> reaction enthalpy *via* metal complexes for advanced amine technology

Kangkang Li<sup>1,\*</sup>, Jian Chen<sup>2</sup>, Simeng Li<sup>2</sup>, Yang Liu<sup>2</sup>, Paul Feron<sup>3</sup>, Hai Yu<sup>3</sup>, Hanming Liu<sup>4</sup>, Yong Cai<sup>5</sup>, Kaiqi Jiang<sup>6,\*</sup>

<sup>1</sup> Department of Energy and Resources Engineering, College of Engineering, Peking University, Beijing, China

<sup>2</sup> State Key Laboratory of Chemical Engineering, Tsinghua University, Beijing 100084, PR China

<sup>3</sup> CSIRO Energy, 10 Murray Dwyer Circuit, Mayfield West, NSW 2304, Australia

<sup>4</sup> Beijing Key Laboratory of CO<sub>2</sub> Capture and Process, Huaneng Clean Energy Research Institute, Beijing, China

<sup>5</sup> China National Petroleum Corporation, Yard 7 Kunlun Road, Changping District, Beijing

<sup>6</sup> Key Laboratory of Resources and Environmental Systems Optimization, College of Environmental Science and Engineering, North China Electric Power University, Beijing, 102206, P. R. China

**\*Corresponding author:**

Email address: [kangkang.li@pku.edu.cn](mailto:kangkang.li@pku.edu.cn) & [kaiqi.jiang@ncepu.edu.cn](mailto:kaiqi.jiang@ncepu.edu.cn)

The SI contains 2 tables and 2 Figures:

**Table S1.** Chemical reactions and their equilibrium constants in Ni(II)-MEA-CO<sub>2</sub>-H<sub>2</sub>O system

**Table S2.** CO<sub>2</sub> loading performance in CO<sub>2</sub> absorption-desorption experiments in 2M MEA solution

**Figure S1.** Desorption system boundary to analyze the three components of regeneration duty including sensible heat, latent heat and reaction heat.

**Figure S2.** Rich split configuration of CO<sub>2</sub> desorption process to recover the latent heat.

Table S1. Chemical reactions and their equilibrium constants in Ni(II)-MEA-CO<sub>2</sub>-H<sub>2</sub>O system.

| MEA-CO <sub>2</sub> -H <sub>2</sub> O reaction <sup>a</sup> |                                                 |                                                               |          |                     |          |
|-------------------------------------------------------------|-------------------------------------------------|---------------------------------------------------------------|----------|---------------------|----------|
| No.                                                         | Reactions                                       | Equilibrium Constant $\ln K = A + \frac{B}{T} + C \ln T + DT$ |          |                     |          |
|                                                             |                                                 | A                                                             | B        | C                   | D        |
| R1                                                          |                                                 | 170.7                                                         | -8477.7  | 21.9                | 0.005781 |
| R2                                                          | $\leftrightarrow H^+ + HCO_3^-$                 | 231.46                                                        | -12092.1 | -36.8               | 0        |
| R3                                                          | $HCO_3^- \leftrightarrow H^+ + CO_3^{2-}$       | 216.0                                                         | -12431.7 | -35.5               | 0        |
| R4                                                          | $MEA + H^+ \leftrightarrow MEAH^+$              | 1974.4                                                        | -7.5     | 56.0                | 0        |
| R5                                                          | $MEACOO^- + H_2O \leftrightarrow MEA + HCO_3^-$ | 47.7                                                          | -1.67    | -13.07              | 0.0651   |
| Ni-MEA complexation <sup>b</sup>                            |                                                 |                                                               |          |                     |          |
|                                                             | Reactions                                       | Equilibrium Constant $lgK$                                    |          | $\Delta H$ , kJ/mol |          |
| R6                                                          | $Ni^{2+} + MEA \leftrightarrow Ni(MEA)^{2+}$    | 3.12                                                          |          | -14                 |          |
| R7                                                          | $Ni^{2+} + 2MEA \leftrightarrow Ni(MEA)_2^{2+}$ | 5.60                                                          |          | -30                 |          |
| R8                                                          | $Ni^{2+} + 3MEA \leftrightarrow Ni(MEA)_3^{2+}$ | 7.30                                                          |          | -41                 |          |

Note: <sup>a</sup> Equilibrium constants are from Kim et al<sup>22</sup>; <sup>b</sup> stability constants and enthalpies are from NIST Data Gateway<sup>23</sup>.

Table S2 CO<sub>2</sub> loading performance in CO<sub>2</sub> absorption-desorption experiments in 2M MEA solution

| Ni(II) concentration                  | CO <sub>2</sub> loading |             |             |             |
|---------------------------------------|-------------------------|-------------|-------------|-------------|
|                                       | Ni/MEA=0                | Ni/MEA=0.05 | Ni/MEA=0.10 | Ni/MEA=0.15 |
| CO <sub>2</sub> absorption at 25 °C   | 0.53                    | 0.51        | 0.46        | 0.41        |
| CO <sub>2</sub> desorption at 40 °C   | 0.47                    | 0.47        | 0.36        | 0.30        |
| CO <sub>2</sub> desorption at 60 °C   | 0.33                    | 0.32        | 0.25        | 0.21        |
| CO <sub>2</sub> desorption at 80 °C   | 0.26                    | 0.22        | 0.20        | 0.15        |
| Cyclic loading between 25°C and 40 °C | 0.06                    | 0.04        | 0.15        | 0.16        |
| Cyclic loading between 25°C and 60 °C | 0.20                    | 0.19        | 0.21        | 0.20        |
| Cyclic loading between 25°C and 80 °C | 0.27                    | 0.29        | 0.26        | 0.26        |

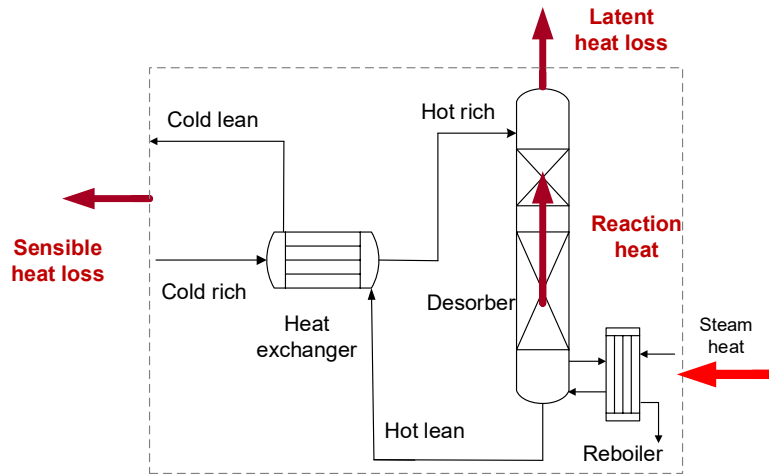

Figure S1. Desorption system boundary to analyze the three components of regeneration duty including sensible heat, latent heat and reaction heat.

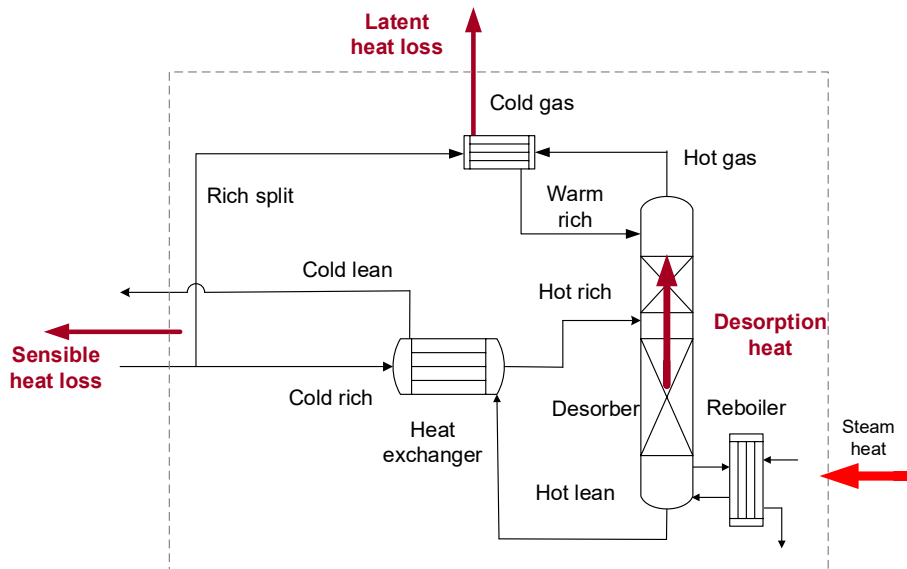

Figure S2. Rich split configuration of CO<sub>2</sub> desorption process to recover the latent heat.
